# Supplementary material
Source: PubMed Central journal article supplement (PMC1413660)

**Non-injected**

**FLAG-ROMK1 WT**

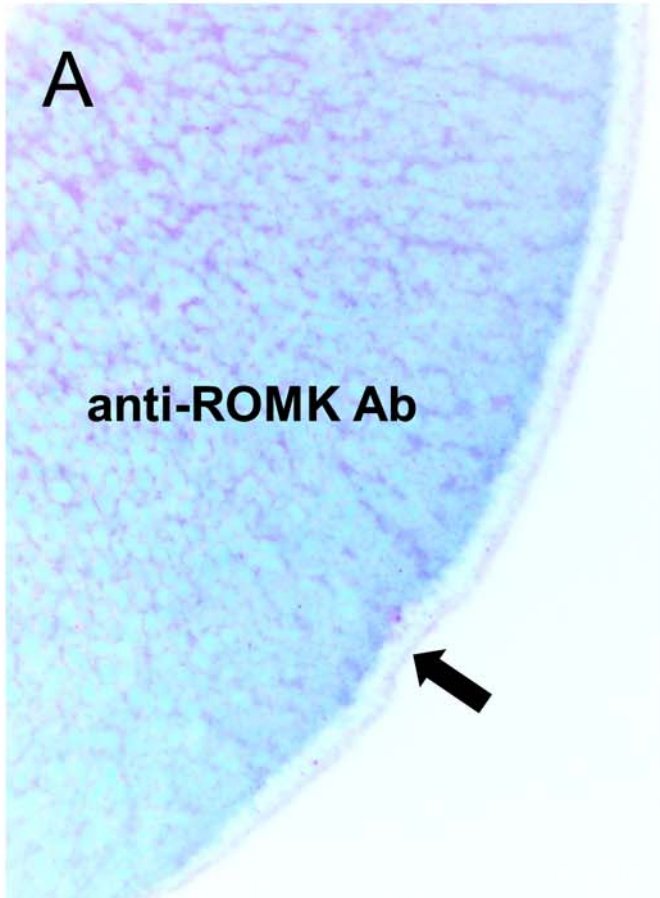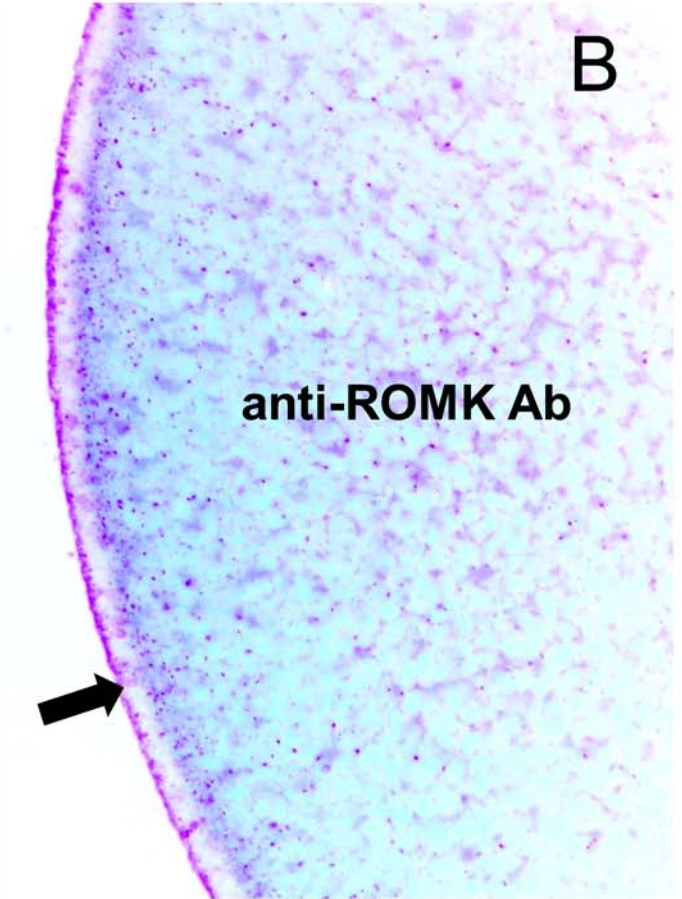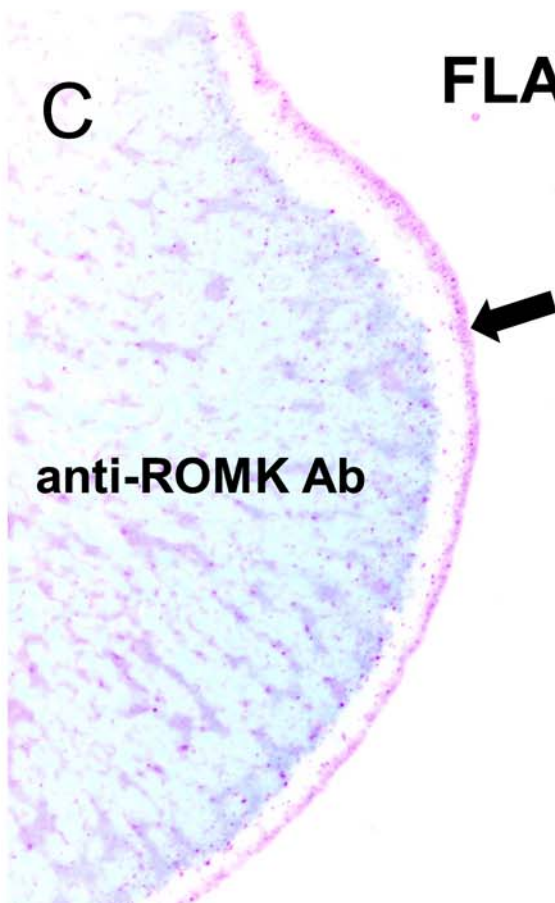

**FLAG-ROMK1 R311Q**

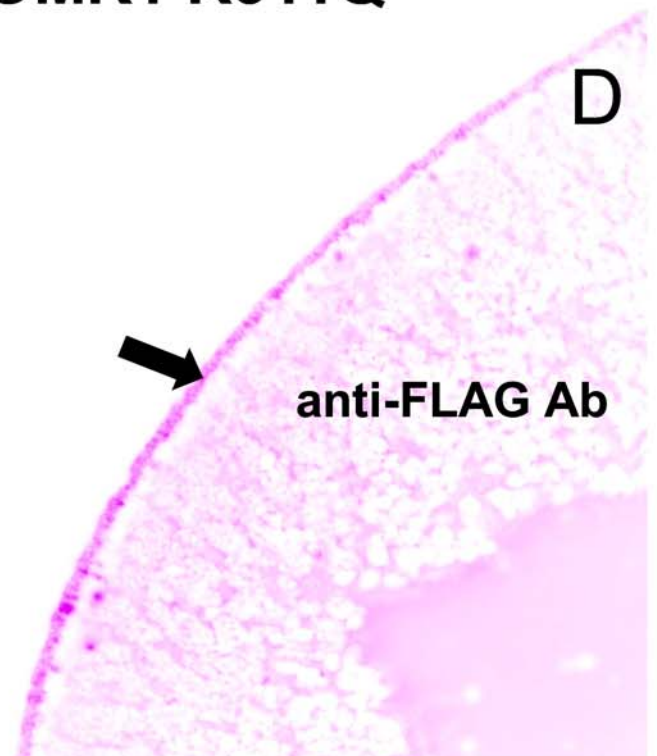

Supplement: pnas_051061013_2.pdf [file pnas_051061013_2.pdf]
